# Supplementary material
Source: HighWire-hosted journal article supplement (https://mct.aacrjournals.org/content/suppl/2014/01/13/1535-7163.MCT-13-0395)
Supplement: tab3.pdf [file tab3.pdf]

**Supplementary Table 3.** Pharmacokinetic parameters of ASP3026 after 5-day repeated oral dosing of ASP3026 in NOD/SCID mice xenografted with NCI-H2228 cells

| Dose<br>(mg/kg/day) | Plasma           |                  |                      | Tumor            |                  |                      | Ratio of<br>tumor/plasma |                      |
|---------------------|------------------|------------------|----------------------|------------------|------------------|----------------------|--------------------------|----------------------|
|                     | C <sub>max</sub> | T <sub>max</sub> | AUC <sub>0-24h</sub> | C <sub>max</sub> | T <sub>max</sub> | AUC <sub>0-24h</sub> | C <sub>max</sub>         | AUC <sub>0-24h</sub> |
|                     | (ng/mL)          | (h)              | (ng·h/mL)            | (ng/g)           | (h)              | (ng·h/g)             |                          |                      |
| 1                   | 44.3             | 4                | 630                  | 850              | 4                | 13600                | 19                       | 22                   |
| 3                   | 140              | 4                | 1820                 | 2270             | 4                | 34400                | 16                       | 19                   |
| 10                  | 508              | 4                | 5990                 | 8990             | 4                | 121000               | 18                       | 20                   |
